# Supplementary material for: Deoxyglucose-conjugated persistent luminescent nanoparticles for theragnostic application in fibrosarcoma tumor model
Source: Royal Society of Chemistry journal article supplement (doi:10.1039/d3ra01169k), 2023-01-01
Supplement: d3ra01169k1.pdf [file d3ra01169k1.pdf]

## ESI

### Deoxyglucose Conjugated Persistent Luminescent Nanoparticles for Theragnostic

#### Application in Fibrosarcoma Tumor Model

K. S. Sharma<sup>#,a</sup>, Pooja K. Melwani<sup>#,b,d</sup>, Hansa D. Yadav<sup>b</sup>, Rashmi Joshi<sup>a,d</sup>, Neena G. Shetake<sup>b,d</sup>, Akhil K. Dubey<sup>c</sup>, Bheeshma Pratap Singh<sup>a</sup>, Suhas Phapale<sup>a</sup>, Prasad P. Phadnis<sup>a,d</sup>, Rajesh K. Vatsa<sup>a,d</sup>, Raghumani Singh Ningthoujam<sup>a,d,\*</sup> and Badri N. Pandey<sup>b,d,\*</sup>

<sup>#</sup>Equal contributors

<sup>a</sup>Chemistry Division, <sup>b</sup>Radiation Biology & Health Sciences Division, <sup>c</sup>Bio-organic Division, Bhabha Atomic Research Centre, Mumbai 400085, India;

<sup>d</sup>Homi Bhabha National Institute, Anushakti Nagar, Mumbai 400094, India

\*Corresponding authors: [rsn@barc.gov.in](mailto:rsn@barc.gov.in) (RSN) & [bnp@barc.gov.in](mailto:bnp@barc.gov.in) (BNP)

## Supplementary Table

**Table S1. Nanoparticles (10 mg) suspended in PBS were exposed to different sources of light (10 min) followed by measurement of fluorescence intensity**

| Light source | Exp. 1<br>(ph/sec/cm <sup>2</sup> /sr) | Exp. 2<br>(ph/sec/cm <sup>2</sup> /sr) | Mean<br>(ph/sec/cm <sup>2</sup> /sr) |
|--------------|----------------------------------------|----------------------------------------|--------------------------------------|
| 254 nm       | $5.47 \times 10^8$                     | $5.44 \times 10^8$                     | $5.45 \times 10^8$                   |
| 355 nm       | $4.08 \times 10^6$                     | $3.60 \times 10^6$                     | $3.84 \times 10^6$                   |

**Supplementary Fig. S1**

**A**

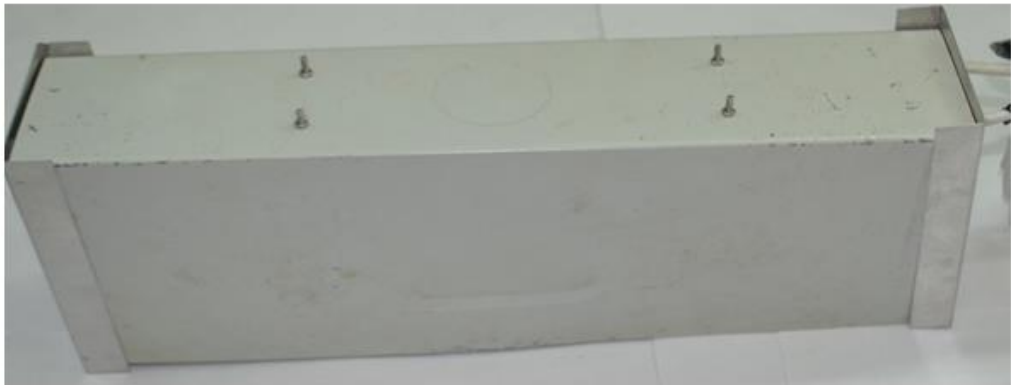

**B**

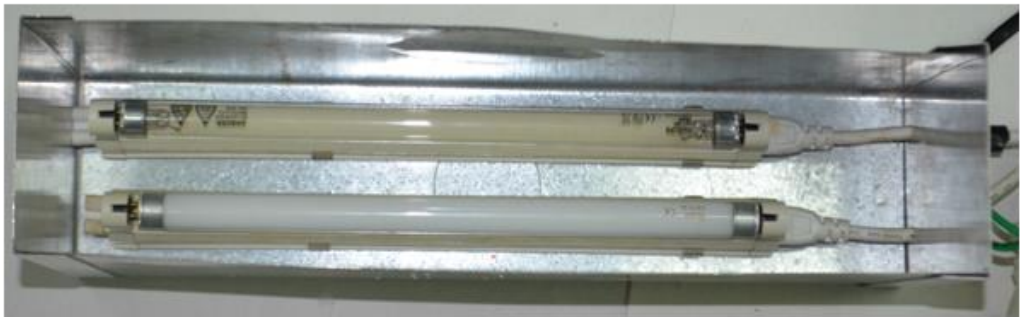

**Fig S1.** UV irradiation set up A. top and B. bottom views. Two UV light sources are for 254 nm and 355 nm wavelengths, which can be operated one at a time.

## Supplementary Fig. S2

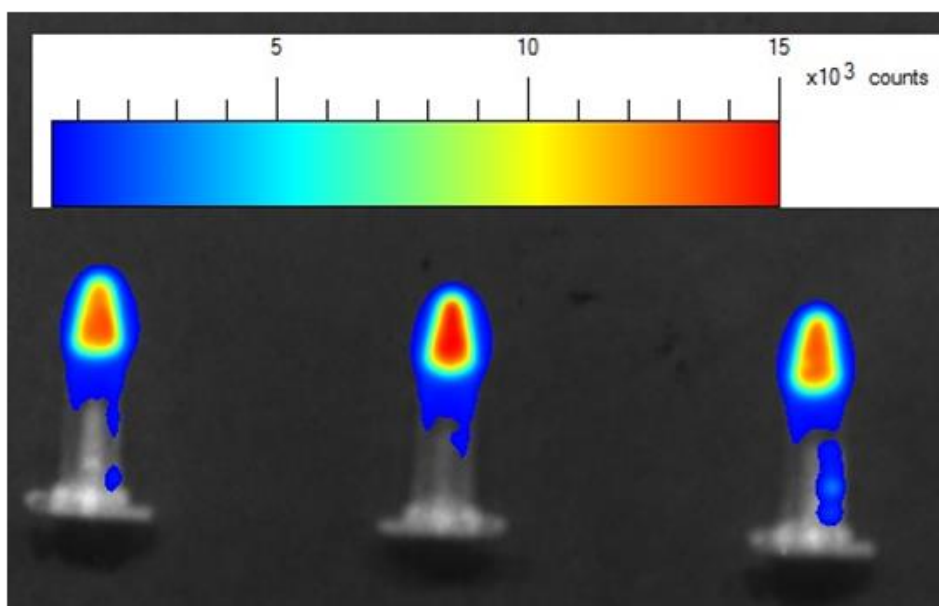

**Fig. S2.** Representative images of nanoparticles in centrifuges exposed with 254 nm UV light. Images were acquired immediately after exposure of light.

**Supplementary Fig. S3**

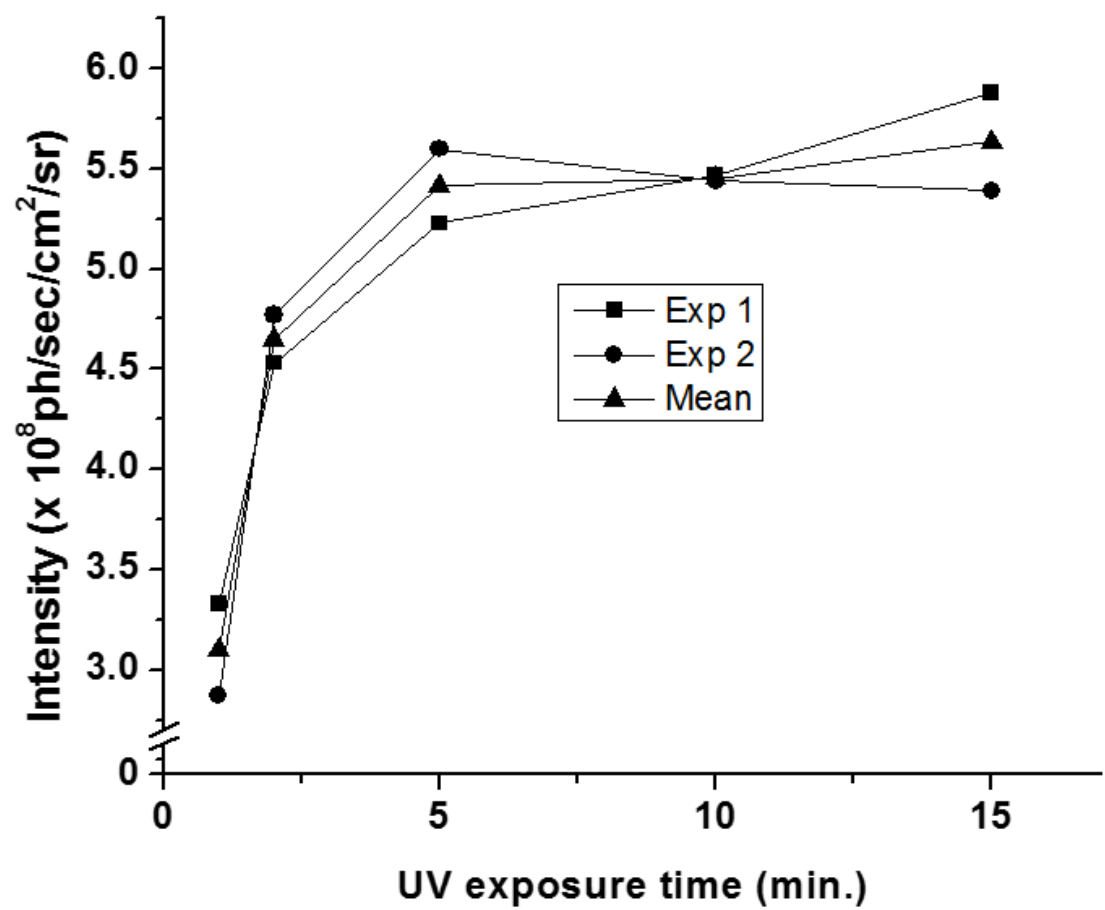

**Fig. S3.** Nanoparticles suspended in PBS were exposed to 254 nm of UV light for different time periods (2-15 min) followed by measurement of fluorescence intensity.

## Supplementary Fig. S4

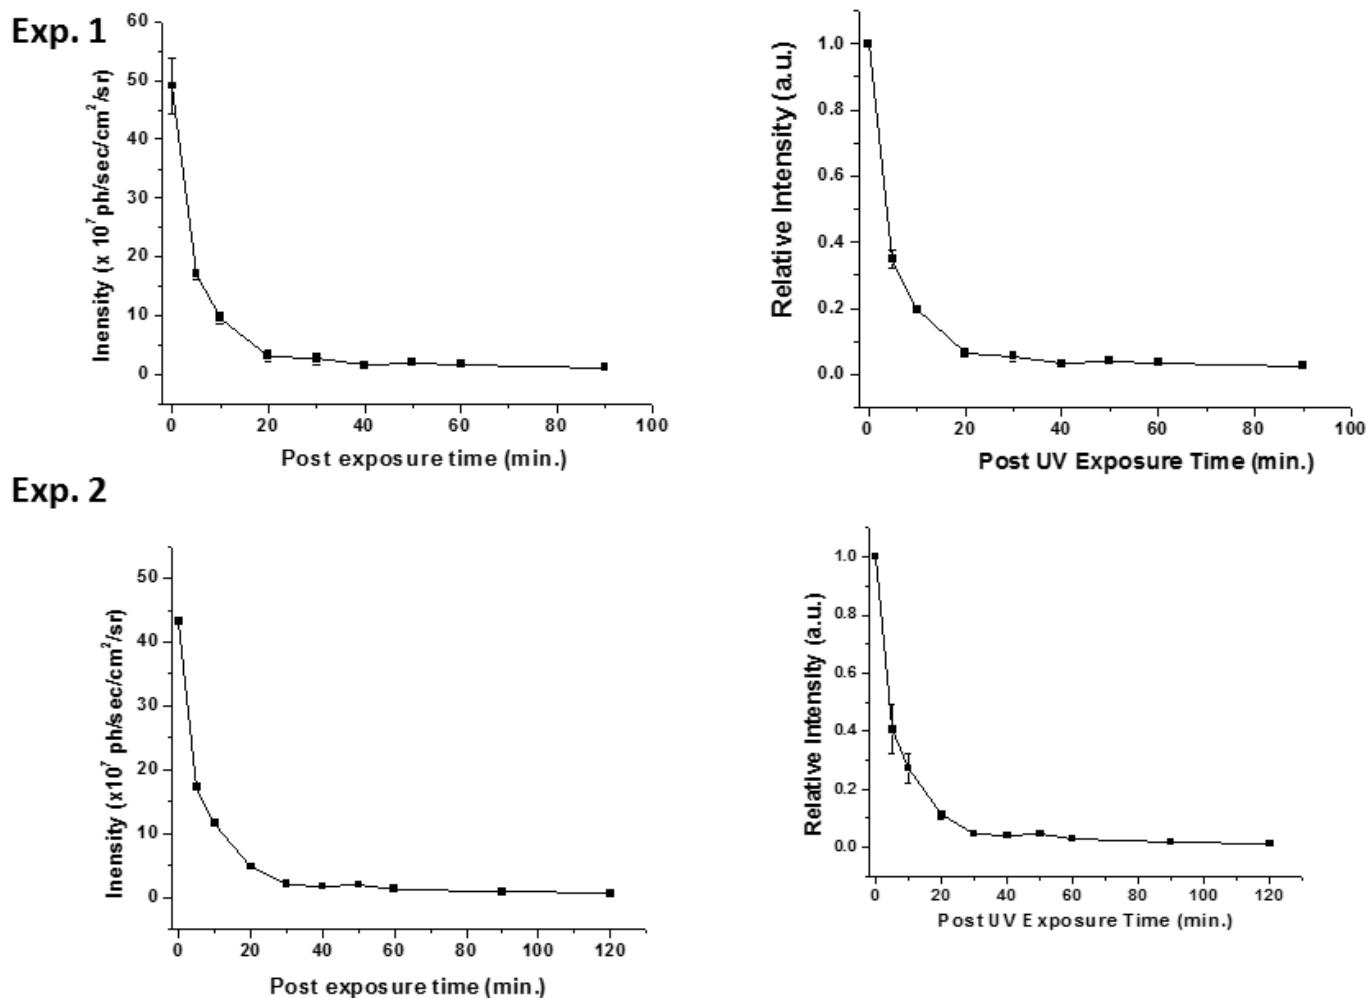

**Fig. S4.** Nanoparticles suspended in PBS were exposed to 254 nm of UV light for 10 min followed by measurement of fluorescence intensity after different periods (up to 120 min) of light exposure. Relative intensity is ratio of fluorescence at specific time to initial fluorescence. a.u.: arbitrary unit.

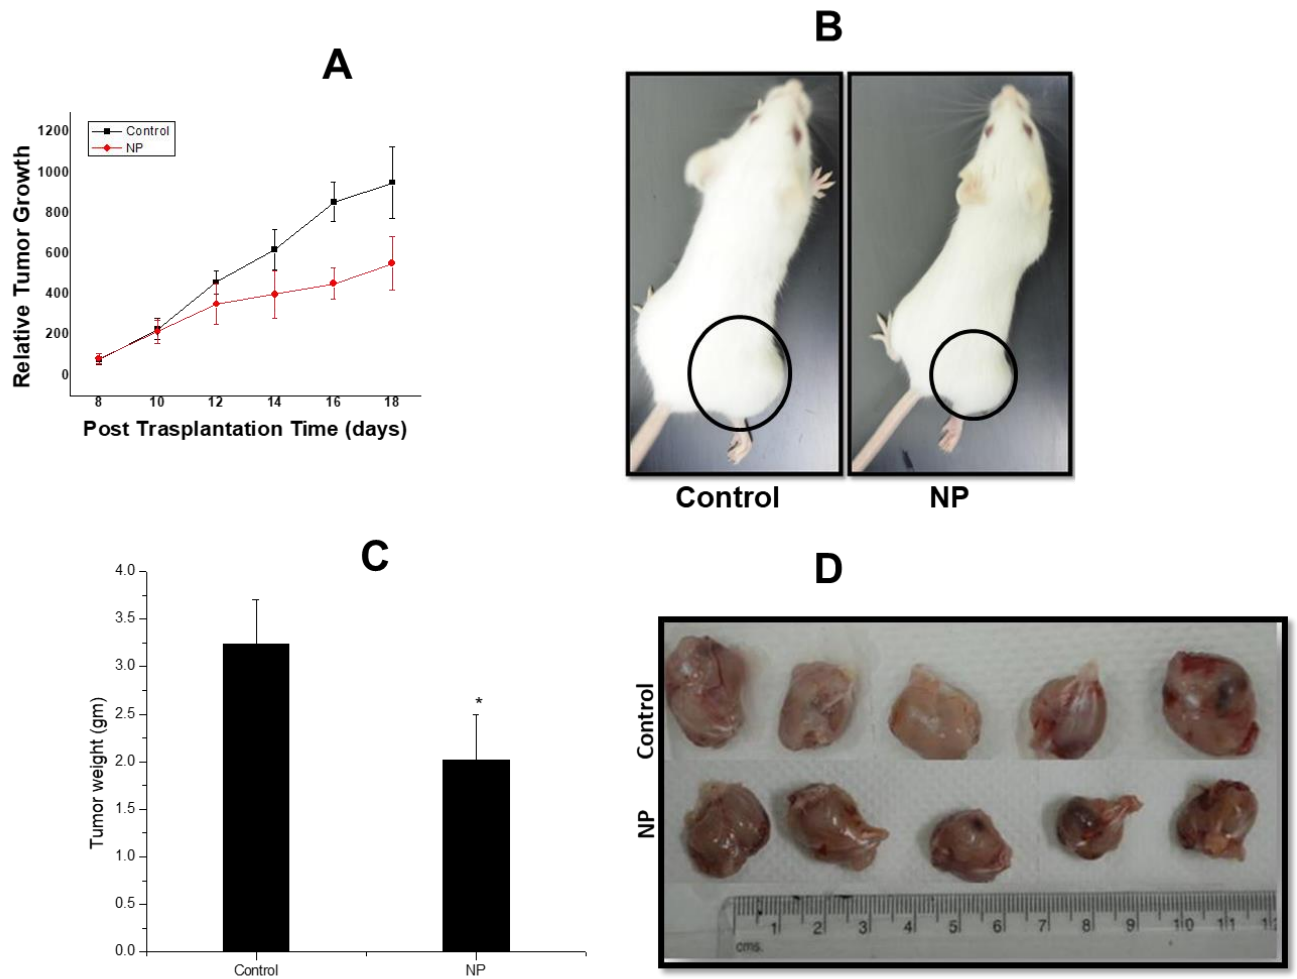

**Fig. S5. A.** WEHI-164 ( $1 \times 10^6$ ) cells were transplanted intramuscularly in the hind leg of mice. After appearance of palpable tumor (8 days), nanoparticles were administered with intratumoral injection of nanoparticles (double injections,  $100 \mu\text{l} + 100 \mu\text{l}$  at the gap of 30 min.) followed by tumor growth measurement up to 19 days. **B.** Representative tumors images of control and nanoparticles treated mice after 19 days of transplantation. **C.** Weight of dissected tumors, **D.** Representative images of tumors after dissection. NP: Nanoparticles treated animals. \*significantly different than control at  $p < 0.05$ .
